# Supplementary material for: ESIPT based Hg2+and fluoride chemosensor for sensitive and selective ‘turn on’ red signal and cell imaging
Source: Royal Society of Chemistry journal article supplement (doi:10.1039/c4ra07838a), 2014-12-08
Supplement: c4ra07838a1.pdf [file c4ra07838a1.pdf]

Supporting information

**ESIPT based Hg<sup>2+</sup> and fluoride chemosensor for sensitive and selective ‘turn on’ red signal and cell imaging**

Shyamaprosad Goswami <sup>\*a</sup>, Sibaprasad Maity <sup>a,b</sup>, Annada C Maity<sup>a</sup>, Avijit kumar Das <sup>a</sup>, Bholanath Pakhira<sup>a</sup>, Sabyasachi Sarkar<sup>a</sup>, Kalyani Khanra<sup>c</sup>, Nandan Bhattacharyya<sup>c</sup>

**General:** The chemicals and solvents were purchased from Sigma-Aldrich Chemicals Private Limited and were used without further purification. Melting points were determined on a hot-plate melting point apparatus in an open-mouth capillary and were uncorrected. <sup>1</sup>H NMR spectra were measured with Bruker AVANCE III 400 MHz spectrometer with TMS as an internal standard. Chemical shifts are expressed in  $\delta$  units and <sup>1</sup>H–<sup>1</sup>H coupling constants in Hz. UV-vis data was collected on a JASCO UV-V530 spectrophotometer and fluorescence experiment was done using Perkin Elmer LS 55 fluorescence spectrophotometer with a fluorescence cell of 10 mm path. Electrospray ionization mass (ESI MS) spectra were run on a Thermo Finnigan (San Jose, CA, USA) LCQTM Advantage MAX quadrupole ion trap instrument, by infusing samples directly into the source at 20  $\mu$ L/min with a syringe pump. The spray voltage was set at 3.7 kV and the capillary temperature at 80<sup>o</sup>C. Elemental analyses were performed on a CE Instrument EA1110 instrument. For bio-imaging studies the photographs were taken in DeWinter Victory-FL fluorescence inverted microscope using DeWinter Biowizard software v 4.4 using 40X objective.

**1. (a) General procedure for drawing Job plot by Fluorescence method:**

Stock solutions of same concentration of **PDP** and Hg<sup>2+</sup> were prepared in the order of  $2.0 \times 10^{-5}$  (M) by using HEPES buffer solution. The intensity of emission in each case with different host–guest ratio but equal in volume was recorded. Job plots were drawn by plotting  $\Delta I \cdot X_{\text{host}}$  vs  $X_{\text{host}}$  ( $\Delta I$  = change of intensity of the fluorescent spectrum at 635 nm during titration and  $X_{\text{host}}$  is the mole fraction of the host).

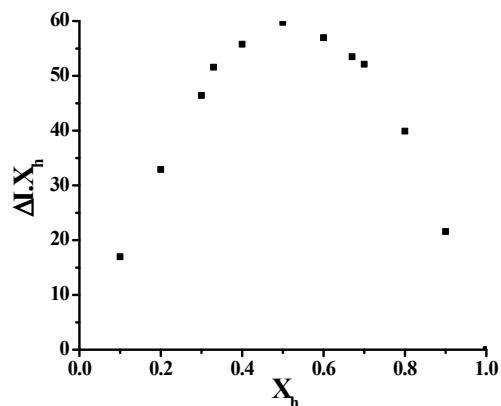

Fig-S<sub>1</sub>: Jobs plot diagram of **PDP** for  $\text{Hg}^{2+}$ .

**(b) General procedure for drawing Job plot by UV-vis method:**

Stock solution of same concentration of **PDP** and  $\text{F}^-$  were prepared in the order of  $2.0 \times 10^{-5}$  (M) in pure  $\text{CH}_3\text{CN}$ . The absorbance in each case with different *host-guest* ratio but equal in volume was recorded. Job plots were drawn by plotting  $\Delta I \cdot X_{\text{host}}$  vs  $X_{\text{host}}$  ( $\Delta I$  = change of intensity of the absorbance spectrum during titration and  $X_{\text{host}}$  is the mole fraction of the host in each case, respectively).

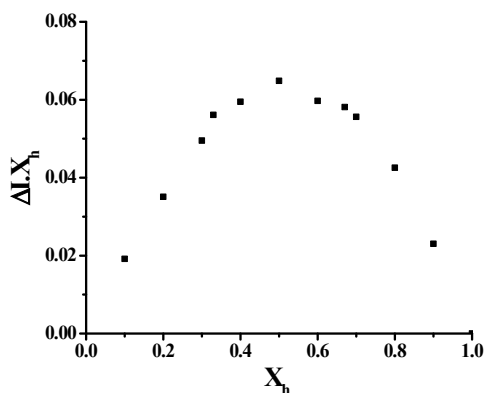

Fig-S<sub>2</sub>: Jobs plot diagram of **PDP** for TBAF.

**2. Association constant determination using fluorescence spectra for  $\text{Hg}^{2+}$  ion:**

The binding constant value of  $\text{Hg}^{2+}$  with **PDP** has been determined from the emission intensity data following the modified Benesi-Hildebrand equation,  $1/\Delta I = 1/\Delta I_{\text{max}} + (1/K[C]) (1/\Delta I_{\text{max}})$ . Here  $\Delta I = I - I_{\text{min}}$  and  $\Delta I_{\text{max}} = I_{\text{max}} - I_{\text{min}}$ , where  $I_{\text{min}}$ ,  $I$  and  $I_{\text{max}}$  are the emission intensities of sensor considered in the absence of  $\text{Hg}^{2+}$ , at an intermediate  $\text{Hg}^{2+}$  concentration and at a concentration of complete saturation where  $K$  is the binding constant and  $[C]$  is the  $\text{Hg}^{2+}$  concentration respectively. From the plot of  $1/(I - I_{\text{min}})$  against  $[C]^{-1}$  for sensor, the value of  $K$  has been

determined from the slope. The association constant ( $K_a$ ) as determined by fluorescence titration method for sensor with  $\text{Hg}^{2+}$  is found to be  $7.5 \times 10^3 \text{ M}^{-1}$  (error < 10%).

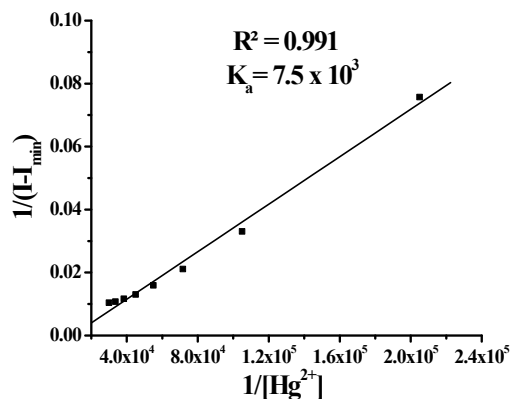

Figure S3: Benesi–Hildebrand plot from fluorescence titration data of PDP ( $C = 2 \times 10^{-5} \text{ M}$ ) with  $\text{Hg}^{2+}$  ( $C = 2 \times 10^{-4} \text{ M}$ ).

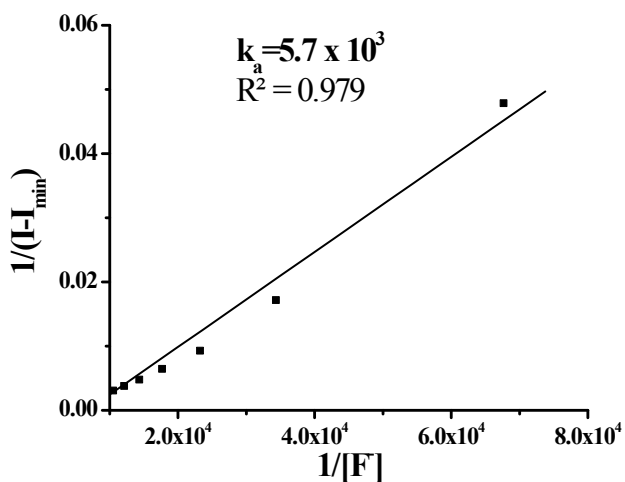

Figure S4: Benesi–Hildebrand plot from fluorescence titration data of PDP ( $C = 2 \times 10^{-5} \text{ M}$ ) with  $\text{F}^-$  ( $C = 1 \times 10^{-3} \text{ M}$ ).

The association constant ( $K_a$ ) as determined by fluorescence titration method for PDP with  $\text{F}^-$  is found to be  $5.7 \times 10^3 \text{ M}^{-1}$

### 3. Calculation of the detection limit:

The detection limit (DL) of PDP sensor in emission spectra for  $\text{Hg}^{2+}$  was determined from the following equation<sup>1</sup>:

$$\text{DL} = K \cdot \text{Sb1} / S$$

Where  $K = 2$  or  $3$  (we take  $3$  in this case);  $\text{Sb1}$  is the standard deviation of the blank solution;  $S$  is the slope of the calibration curve.

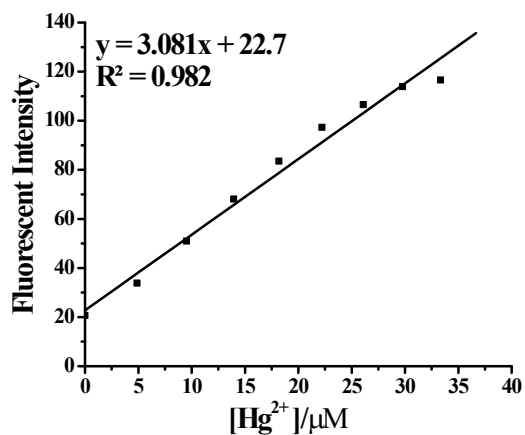

Figure S<sub>5</sub>: Changes of Fluorescence intensity of PDP ( $C = 2 \times 10^{-5} \text{M}$ ) as a function of  $[\text{Hg}^{2+}]$  ( $C = 2 \times 10^{-4} \text{M}$ ) at 635 nm.

From the graph Fig.S<sub>5</sub>, we get slope = 3.081, and Sb1 value is 5.0414.

Thus using the formula we get the Detection Limit for  $\text{Hg}^{2+} = 4.9 \mu\text{M}$  in Fluorescence spectra.

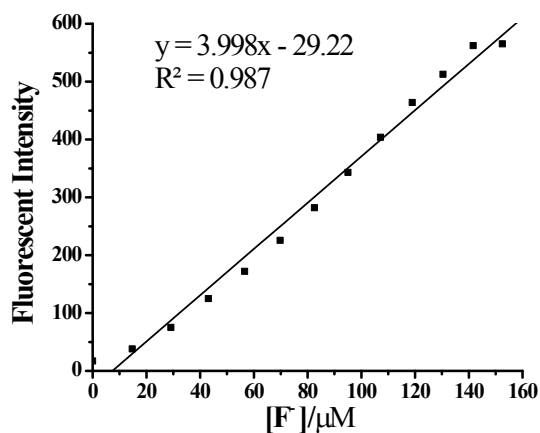

Figure S<sub>6</sub>: Changes of Fluorescence intensity of PDP ( $C = 2 \times 10^{-5} \text{M}$ ) as a function of  $[\text{F}^-]$  ( $C = 1 \times 10^{-3} \text{M}$ ) at 653 nm.

From the graph Fig.S<sub>6</sub>, we get slope = 3.998, and Sb1 value is 16.989.

Thus using the formula we get the Detection Limit for  $\text{F}^- = 12.7 \mu\text{M}$  in Fluorescence spectra.

**Ref.1:** Zhu, M.; Yuan, M.; Liu, X.; Xu, J.; Lv, J.; Huang, C.; Liu, H.; Li, Y.; Wang, S.; Zhu, D. *Org. Lett.* **2008**, *10*, 1481-1484.

4. Fluorescence spectra of PDP on titration with different interfering metal ions:

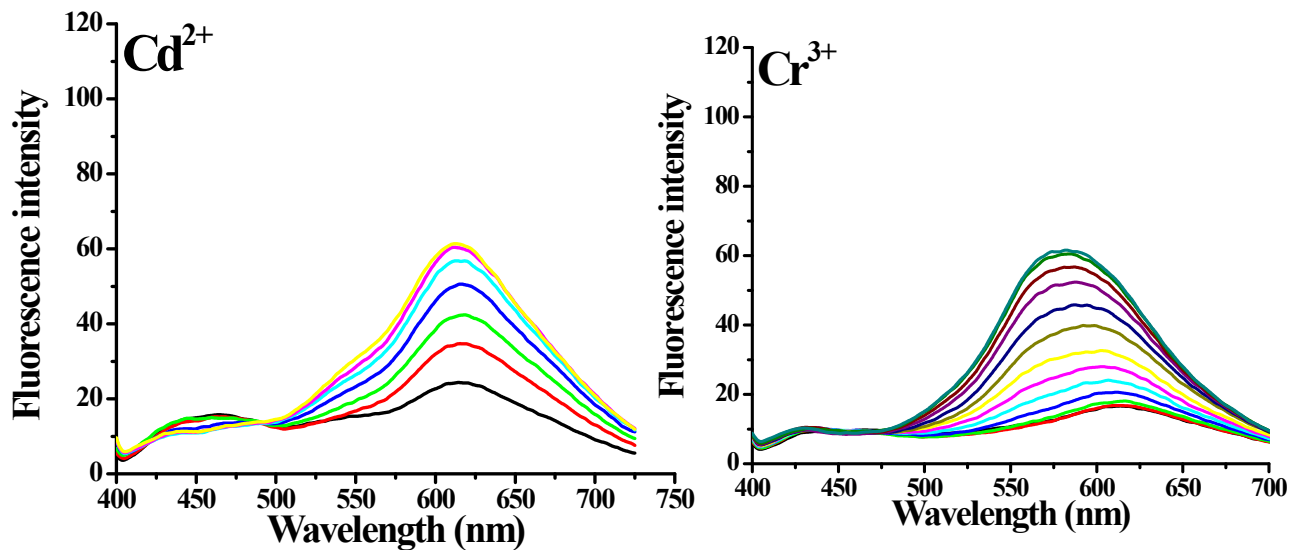

5. Fluorescence as well as UV-vis spectra of PDP with interfering acetate ion.

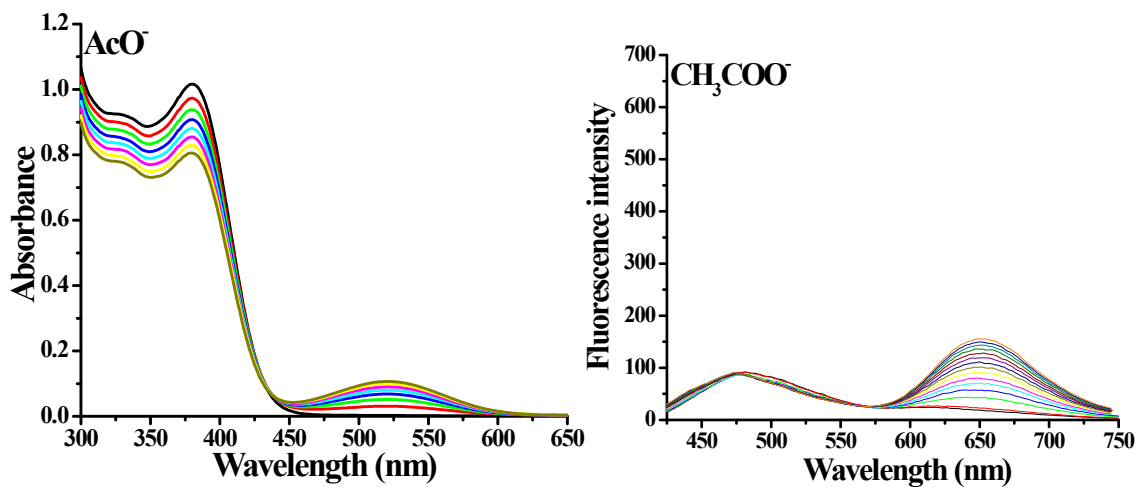

## 6. Synthesis of PDP:

5-amino-1,10-phenanthroline (0.97 g, 5 mmol.) was added to a solution of the 2-hydroxy-5-methylbenzene-1,3-dicarbaldehyde (0.41 g, 2.5 mmol) in ethanol (50 mL) at reflux, and heating was continued for 2 day. A yellow precipitate was filtered and washed with ethanol. The product was purified by recrystallization from ethanol Yield: 790 mg, 62%.

$^1\text{H NMR}$  (400 MHz,  $\text{CDCl}_3$ , 298 K)  $\delta$  = 13.56 (s, 1H), 9.26 (d, 2H,  $J$  = 5.92 Hz), 9.16 (d, 2H,  $J$  = 5.60 Hz), 9.15 (s, 1H), 8.76 (d, 2H,  $J$  = 7.88 Hz), 8.28 (d, 2H,  $J$  = 9.44 Hz), 7.71-7.68 (m, 4H), 7.65-7.63 (m, 3H), 7.56 (s, 2H), 2.49 (s, 3H).

ESI (m/z, %):  $\text{M}^+$  Calculated for  $\text{C}_{33}\text{H}_{22}\text{N}_6\text{O}$  is 518.19; Found: 519.27 ( $\text{M}+\text{H}$ ) $^+$

Anal calcd for  $\text{C}_{33}\text{H}_{22}\text{N}_6\text{O}$ : 76.43% C, 4.28% H, 16.21% N, 3.09% O; found: 76.41% C, 4.31% H, 16.25% N, 3.16% O.

## 7. a) $^1\text{H NMR}$ spectra of PDP in $\text{CDCl}_3$ :

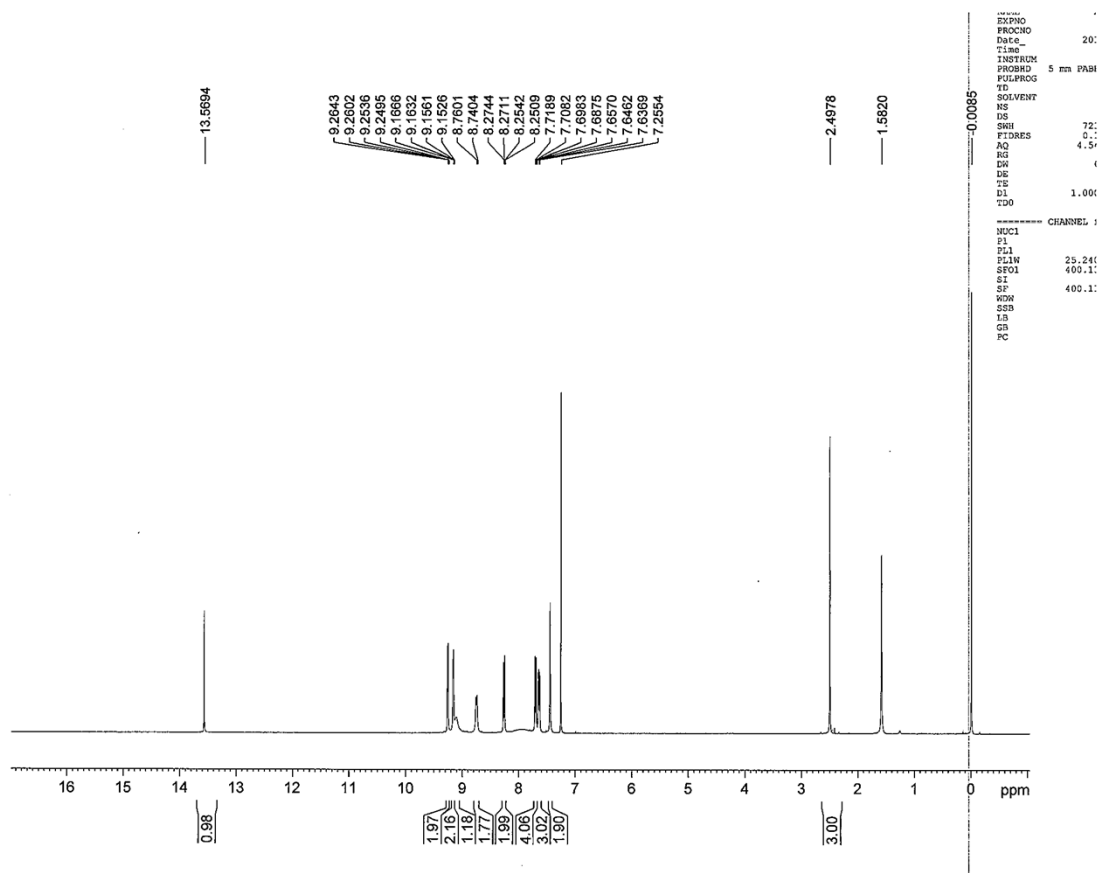

Figure: S<sub>7</sub>

b) Mass (ESI) spectra of PDP

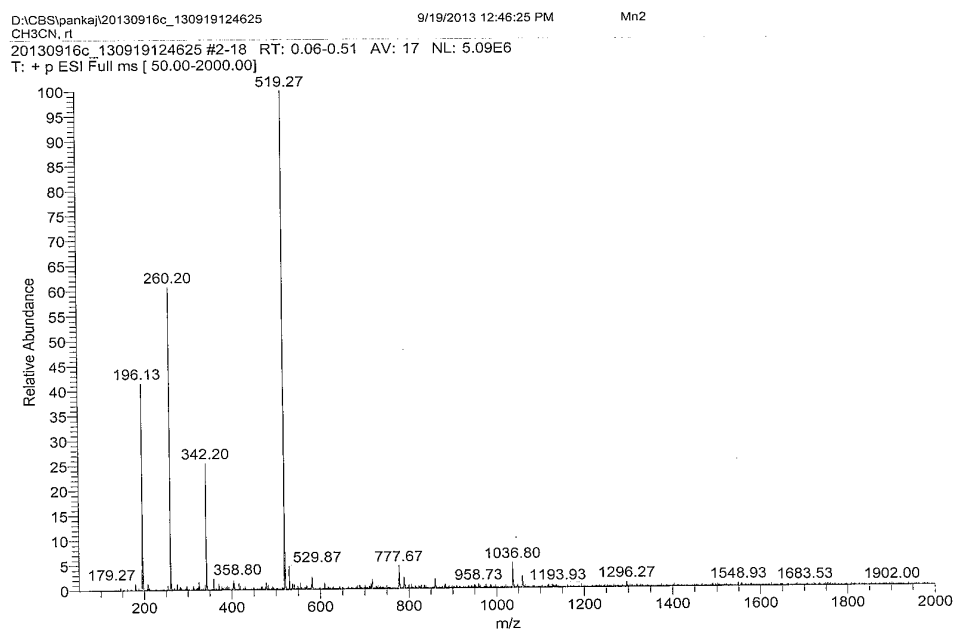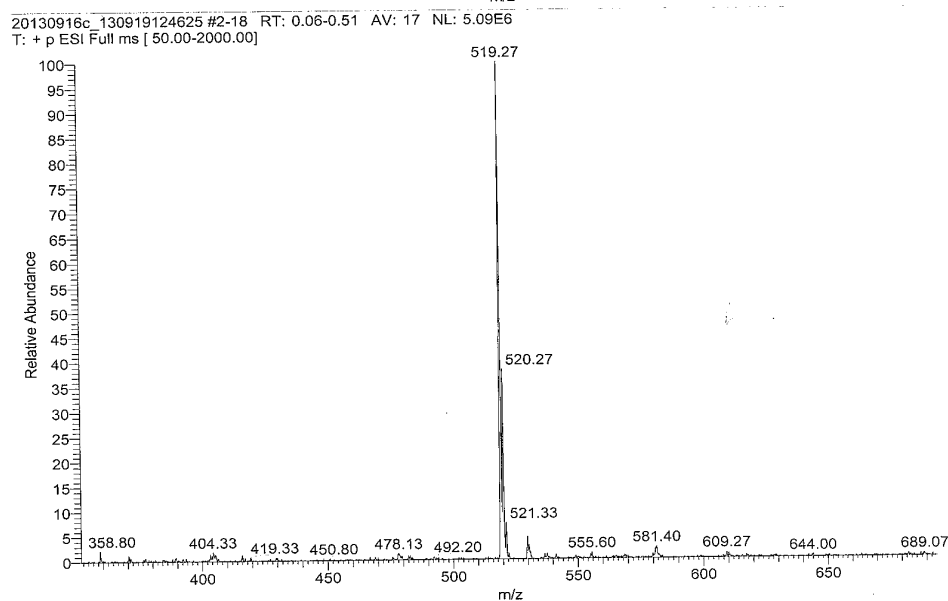

Figure: S<sub>8</sub>

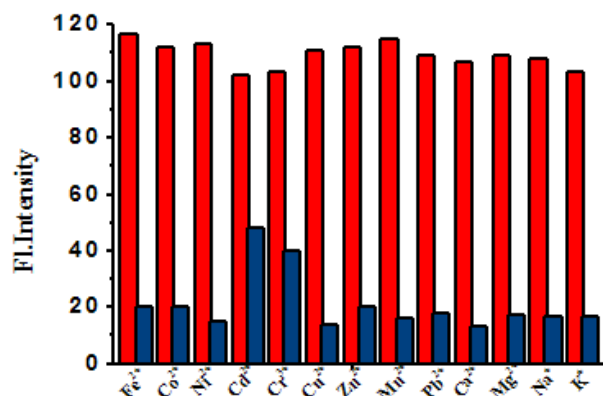

Figure S<sub>9</sub>: (b) Mercury selectivity profile of the sensor PDP (20  $\mu$ M): (blue bars) change of emission intensity of PDP + 3.0 equiv. of different metal ions; (red bars) change of emission intensity of PDP + 3.0 equiv. of different metal ions, followed by 3.0 equiv.  $\text{Hg}^{2+}$  at 635 nm.

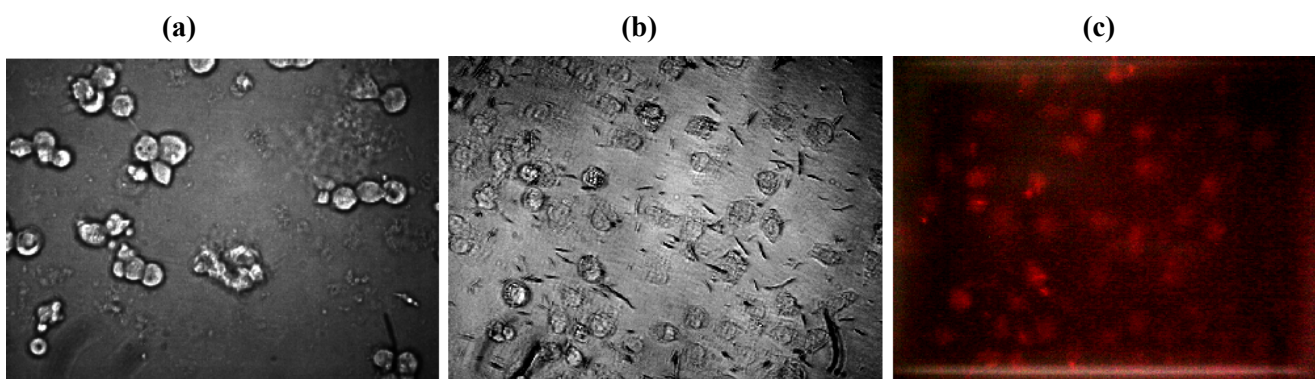

Figure S<sub>10</sub>. NCI-H460 cells showed red fluorescence. (a) NCI-H460 cells without any treatment. (b) NCI-H460 cells in presence of  $\text{HgCl}_2$  ( $1 \times 10^{-5}$  M) (c) NCI-H460 cells in presence of both PDP ( $2 \times 10^{-5}$  M) and  $\text{HgCl}_2$  ( $1 \times 10^{-5}$  M). The photographs were taken in DeWinter Victory-FL fluorescence inverted microscope using DeWinter Biowizard software v 4.4 using 40X objective.



**The study of the fluorescence appearance with increasing concentrations of Hg to the probe incubated cell:**

For this experiment this time we treated the cells with PDP ( $c=4 \times 10^{-6}$  M). Then we cells with increasing concentrations of  $\text{HgCl}_2$  ( $c=2 \times 10^{-5}$  M,  $4 \times 10^{-5}$  M,  $6 \times 10^{-5}$  M,  $8 \times 10^{-5}$  M, and  $1.2 \times 10^{-4}$  M). The photographs were taken in DeWinter Victory-FL fluorescence inverted microscope using DeWinter Biowizard software v 4.4 using 10X objective. In this connection, we like to emphasize that the cells which are showing the fluorescence are definitely not dead cells as they were still attached to the surface whereas the dead cells were floating.

In this new figure a) and b), cells were treated with  $2 \times 10^{-5}$  M  $\text{HgCl}_2$  and  $4 \times 10^{-6}$  M PDP. Figure a) shows bright field fluorescence image of the cells whereas Figure b) shows the dark field fluorescence image of the cells. In figure c) and d), cells were treated with  $4 \times 10^{-5}$  M  $\text{HgCl}_2$  keeping the PDP concentration fixed. Figure c) shows bright field fluorescence image of the cells whereas Figure d) shows the dark field fluorescence image of the cells. In figure e) and f), cells were treated with  $6 \times 10^{-5}$  M  $\text{HgCl}_2$  keeping the PDP concentration fixed. Figure e) shows bright field fluorescence image of the cells whereas Figure f) shows the dark field fluorescence image of the cells.

The data shown above indicate that the fluorescence intensity of the cells increases with increasing concentrations of  $\text{HgCl}_2$ .

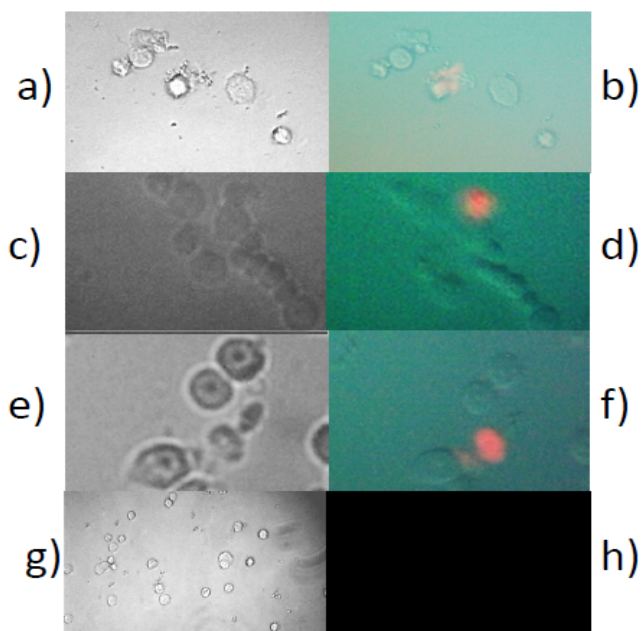

**Figure S<sub>11</sub>:** NCI-H460 cells showed red fluorescence. Figure a) and b): cells were treated with  $2 \times 10^{-5}$  M  $\text{HgCl}_2$  and  $4 \times 10^{-6}$  M PDP. Figure a) shows bright field fluorescence image of the cells whereas Figure b) shows the dark field fluorescence image of the cells. Figure c) and d): cells were treated with  $4 \times 10^{-5}$  M  $\text{HgCl}_2$  keeping the PDP concentration fixed ( $4 \times 10^{-6}$  M). Figure c) shows bright field fluorescence image of the cells whereas Figure d) shows the dark field fluorescence image of the cells. Figure e) and f), cells

were treated with  $6 \times 10^{-5}$  M  $\text{HgCl}_2$  keeping the PDP concentration fixed. Figure e) shows bright field fluorescence image of the cells whereas Figure f) shows the dark field fluorescence image of the cells. Figure g) and h): NCI-H460 cells were treated with PDP alone. g) shows the bright field fluorescence image of cells, (h) shows the dark field image of cells. The photographs were taken in DeWinter Victory-FL fluorescence inverted microscope using DeWinter Biowizard software v 4.4 using 10X objective.

### Computational study:

DFT calculations were performed using the Gaussian 03 (Revision B.04) package while Gauss View used for visualization of Molecular orbital. The Keto and enol form of PDP were optimized with B3LYP functional and 6-311+G (d, p) basis set with no symmetry constrain. For  $\text{Hg}^{2+}$  bound species LANL2DZ of Hg and for rest of the atoms 6-31g\*+ were used for optimization as well as single point calculation gas phase. Molecular orbitals were analysed using the AOMix program

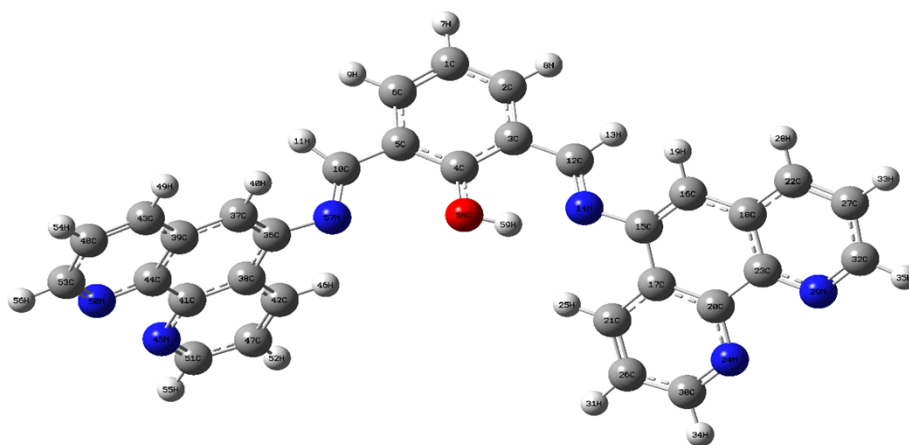

Optimized structure of Enol form of PDP

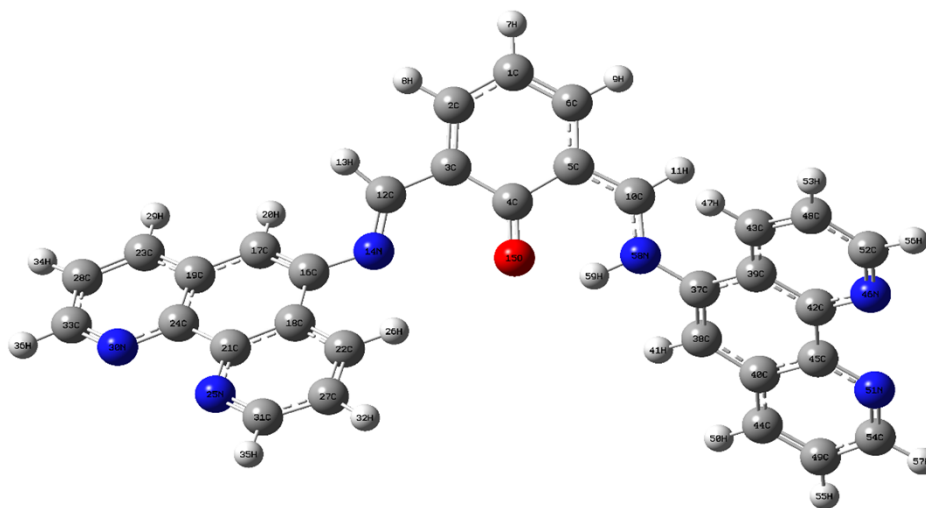

### Optimized structure of keto form of PDP

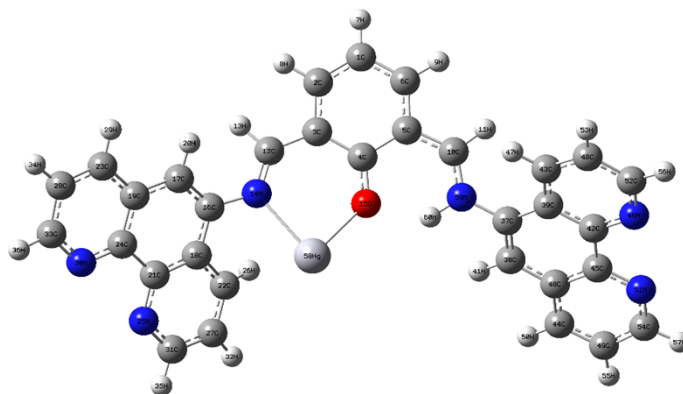

### Optimized structure of Hg<sup>2+</sup> bound Complex

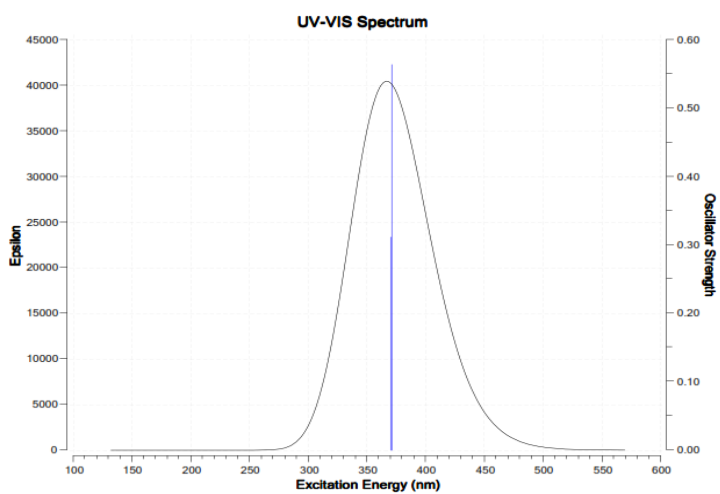

### UV-vis spectrum of Enol form of PDP.

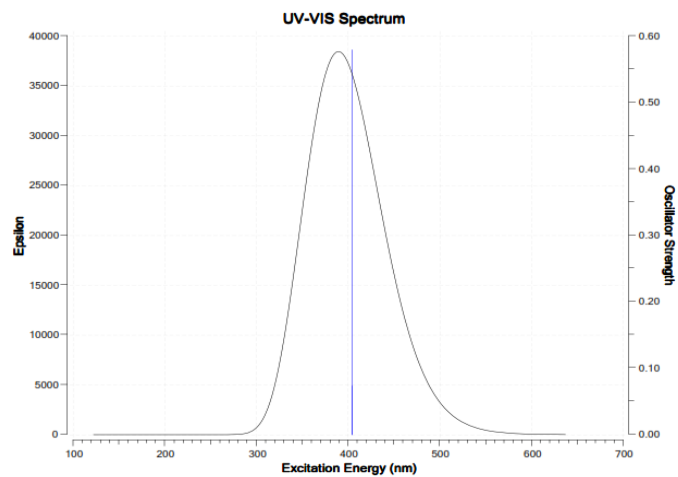

UV-vis spectrum of Keto form of PDP.

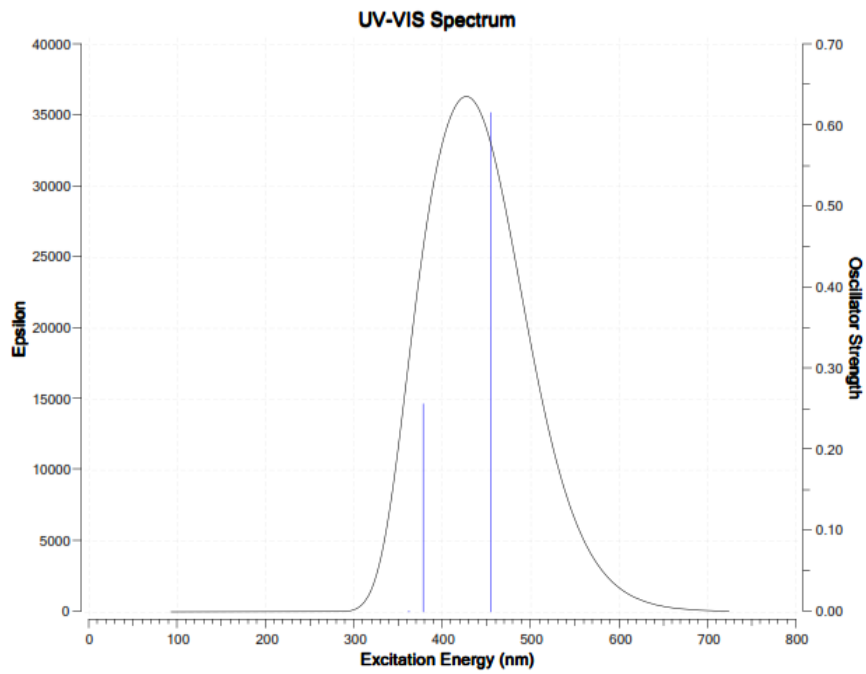

UV-vis spectrum of PDP-Hg<sup>2+</sup> complex

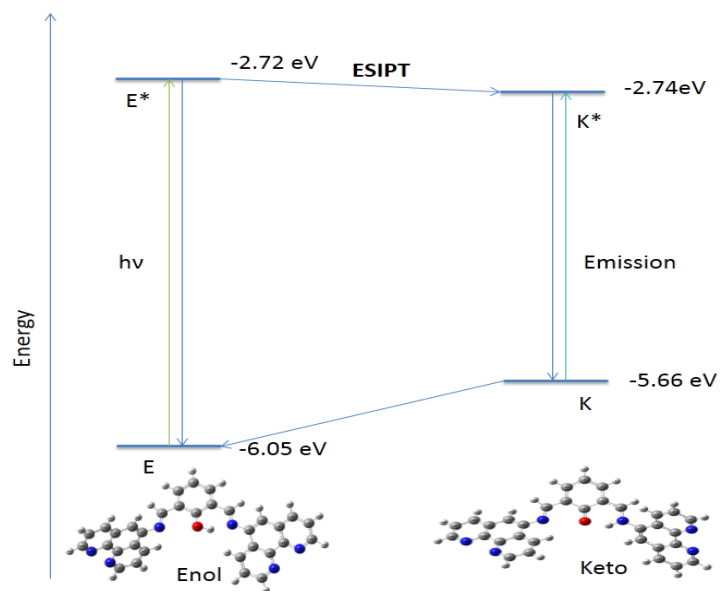

Probable mode of intramolecular proton transfer.

**Optimized parameter:**

Enol(PDP) form:

|   |             |             |             |
|---|-------------|-------------|-------------|
| C | -0.02052200 | 4.34726600  | -1.89403100 |
| C | 1.21563900  | 3.74836500  | -1.66682600 |
| C | 1.31221700  | 2.49139800  | -1.05796900 |
| C | 0.12023200  | 1.80962700  | -0.66044700 |
| C | -1.14367400 | 2.42009700  | -0.87701100 |
| C | -1.17234000 | 3.68571900  | -1.49834000 |
| H | -0.08140800 | 5.32234800  | -2.36033800 |
| H | 2.12815000  | 4.25690700  | -1.95999800 |
| H | -2.14063800 | 4.14639500  | -1.66699300 |
| C | -2.44452300 | 1.84887200  | -0.51491500 |
| H | -3.27870500 | 2.54873800  | -0.66916800 |
| C | 2.62688100  | 1.92155100  | -0.81677500 |
| H | 3.48355400  | 2.53019500  | -1.12844100 |
| N | 2.80732600  | 0.75347400  | -0.30348200 |
| C | 4.08517000  | 0.27058500  | 0.00411300  |
| C | 5.06742600  | 1.04480300  | 0.55786600  |
| C | 4.32794600  | -1.14259000 | -0.22006700 |
| C | 6.34505800  | 0.50405900  | 0.89719700  |
| H | 4.87131700  | 2.08440800  | 0.79872200  |
| C | 5.59280500  | -1.71215300 | 0.09086200  |
| C | 3.34020300  | -1.99449200 | -0.75846400 |

|   |             |             |             |
|---|-------------|-------------|-------------|
| C | 7.35629600  | 1.29524600  | 1.48452100  |
| C | 6.63619000  | -0.86812300 | 0.66195100  |
| N | 5.86548900  | -3.01751900 | -0.11756500 |
| H | 2.36726500  | -1.59055100 | -1.00372300 |
| C | 3.63256300  | -3.32501200 | -0.95652600 |
| C | 8.57013000  | 0.72334400  | 1.79026900  |
| H | 7.16622300  | 2.34468300  | 1.68635800  |
| N | 7.83191300  | -1.41336900 | 0.96078900  |
| C | 4.91826500  | -3.78566100 | -0.62118000 |
| H | 2.89645200  | -4.00979200 | -1.36071900 |
| C | 8.75738700  | -0.64174800 | 1.50086700  |
| H | 9.36901200  | 1.29994500  | 2.24133700  |
| H | 5.17868500  | -4.82991300 | -0.77602900 |
| H | 9.70863400  | -1.11842800 | 1.72434500  |
| C | -3.99553600 | 0.27849300  | 0.19548800  |
| C | -4.70134600 | 0.77473800  | 1.25476000  |
| C | -4.56798600 | -0.76494600 | -0.62029600 |
| C | -5.99902700 | 0.27356800  | 1.58593400  |
| H | -4.26311100 | 1.54994400  | 1.87478600  |
| C | -5.87475000 | -1.25963300 | -0.34924100 |
| C | -3.86646300 | -1.31033600 | -1.71441800 |
| C | -6.72231800 | 0.75705500  | 2.69695700  |
| C | -6.61050000 | -0.73901300 | 0.79693000  |
| N | -6.45387100 | -2.19858400 | -1.12515000 |
| H | -2.85944400 | -0.96873100 | -1.92207600 |
| C | -4.47034700 | -2.27823600 | -2.48728000 |

|   |             |             |             |
|---|-------------|-------------|-------------|
| C | -7.97057900 | 0.24326600  | 2.96797900  |
| H | -6.28486300 | 1.52569700  | 3.32591300  |
| N | -7.83577600 | -1.23161400 | 1.07067300  |
| C | -5.77505500 | -2.68020700 | -2.15149900 |
| H | -3.96115900 | -2.72488000 | -3.33327100 |
| C | -8.48442300 | -0.75405500 | 2.11715300  |
| H | -8.55157800 | 0.58880300  | 3.81510600  |
| H | -6.28440100 | -3.43097800 | -2.75122600 |
| H | -9.46867700 | -1.17571500 | 2.30621000  |
| N | -2.67334000 | 0.67007100  | -0.08426700 |
| O | 0.19482700  | 0.65317600  | -0.01271300 |
| H | 1.14377400  | 0.39722700  | 0.02855400  |

Keto(PDP) form:

|   |             |            |             |
|---|-------------|------------|-------------|
| C | -0.04102300 | 4.72873100 | -0.49467900 |
| C | -1.22677100 | 3.96916000 | -0.37170000 |
| C | -1.24910700 | 2.59265400 | -0.23780500 |
| C | 0.01661100  | 1.85690100 | -0.18888100 |
| C | 1.23657000  | 2.67325500 | -0.31797300 |
| C | 1.16630100  | 4.08392100 | -0.47382300 |
| H | -0.09704900 | 5.80392100 | -0.60645200 |
| H | -2.17844800 | 4.49348400 | -0.39128000 |
| H | 2.09158100  | 4.64440300 | -0.57282800 |

|   |             |             |             |
|---|-------------|-------------|-------------|
| C | 2.48775900  | 2.04728800  | -0.31354400 |
| H | 3.38644300  | 2.64168000  | -0.45366000 |
| C | -2.55525300 | 1.94864700  | -0.14522400 |
| H | -3.39938400 | 2.65575800  | -0.11196700 |
| N | -2.76359500 | 0.68934100  | -0.09679000 |
| O | 0.08848400  | 0.61664900  | -0.04486500 |
| C | -4.06592900 | 0.18934200  | -0.08420500 |
| C | -5.06789500 | 0.65255800  | -0.89511900 |
| C | -4.31969500 | -0.94262600 | 0.78592500  |
| C | -6.37257700 | 0.07011100  | -0.87868500 |
| H | -4.86765500 | 1.45565900  | -1.59631400 |
| C | -5.61127200 | -1.52931200 | 0.85109800  |
| C | -3.30125600 | -1.49254900 | 1.59013900  |
| C | -7.40908800 | 0.53688100  | -1.71541900 |
| C | -6.67404400 | -1.00912700 | -0.00181400 |
| N | -5.88954300 | -2.56613500 | 1.67028100  |
| H | -2.30508300 | -1.07251000 | 1.52654700  |
| C | -3.59961400 | -2.55453900 | 2.41439200  |
| C | -8.65199300 | -0.05019400 | -1.64719400 |
| H | -7.21329700 | 1.35547300  | -2.40065600 |
| N | -7.89669100 | -1.57481900 | 0.05657100  |
| C | -4.91627500 | -3.04842100 | 2.42079900  |
| H | -2.84374000 | -3.00885000 | 3.04447700  |
| C | -8.84297800 | -1.10616300 | -0.73678400 |
| H | -9.47049200 | 0.28445500  | -2.27384300 |
| H | -5.18094400 | -3.88181000 | 3.06808100  |



|   |             |             |             |
|---|-------------|-------------|-------------|
| H | -9.81569000 | -1.58626500 | -0.65837900 |
| C | 3.85974200  | 0.01575400  | -0.22442300 |
| C | 3.92426600  | -1.07478900 | -1.03939700 |
| C | 4.99375700  | 0.39583800  | 0.58829400  |
| C | 5.12358600  | -1.83767200 | -1.16735000 |
| H | 3.05688700  | -1.35344000 | -1.62808300 |
| C | 6.21979400  | -0.31916800 | 0.45115700  |
| C | 4.94536100  | 1.41293400  | 1.56659500  |
| C | 5.20704200  | -2.96177200 | -2.01706200 |
| C | 6.29198500  | -1.45854100 | -0.45491000 |
| N | 7.32212000  | 0.00005000  | 1.15979500  |
| H | 4.02058700  | 1.94006200  | 1.76181300  |
| C | 6.07460400  | 1.71072700  | 2.29459800  |
| C | 6.40128200  | -3.63519800 | -2.12370000 |
| H | 4.33172100  | -3.27834500 | -2.57425600 |
| N | 7.45885000  | -2.12420700 | -0.57255600 |
| C | 7.24995500  | 0.98455300  | 2.03419100  |
| H | 6.06333600  | 2.47970300  | 3.05754800  |
| C | 7.50186800  | -3.16919300 | -1.37800300 |
| H | 6.50556200  | -4.50287200 | -2.76397200 |
| H | 8.16379400  | 1.21221700  | 2.57739800  |
| H | 8.45911100  | -3.67978400 | -1.44857400 |
| N | 2.63991800  | 0.73689300  | -0.16525000 |
| H | 1.71319100  | 0.25605700  | -0.09798400 |

PDP-Hg<sup>2+</sup> bound complex:

|   |             |             |             |
|---|-------------|-------------|-------------|
| C | 0.35563900  | 4.63426200  | -1.71814500 |
| C | -0.83168100 | 3.89769200  | -1.65581100 |
| C | -0.87626000 | 2.53496100  | -1.23606800 |
| C | 0.37217400  | 1.86590900  | -0.92285100 |
| C | 1.59518400  | 2.64991100  | -0.96910800 |
| C | 1.55875200  | 4.01188800  | -1.36199500 |
| H | 0.34353100  | 5.67067400  | -2.03598200 |
| H | -1.76503900 | 4.38771600  | -1.92564700 |
| H | 2.48845700  | 4.57538400  | -1.40656100 |
| C | 2.88840500  | 2.08577000  | -0.68461600 |
| H | 3.74975100  | 2.74698200  | -0.71319800 |
| C | -2.21282000 | 1.97992900  | -1.15087700 |
| H | -2.98983600 | 2.63272700  | -1.56232600 |
| N | -2.60243100 | 0.82224700  | -0.65086600 |
| O | 0.47835200  | 0.55877400  | -0.65707200 |
| C | -3.94606900 | 0.45360500  | -0.41974500 |
| C | -4.90885000 | 1.35206000  | 0.04994600  |
| C | -4.24704400 | -0.95684600 | -0.48111800 |
| C | -6.19927500 | 0.91712500  | 0.46236700  |
| H | -4.66435200 | 2.40830200  | 0.14763100  |
| C | -5.48814300 | -1.44750300 | 0.05117800  |
| C | -3.34061800 | -1.91956900 | -1.04127000 |

|   |             |             |             |
|---|-------------|-------------|-------------|
| C | -7.20373300 | 1.83589700  | 0.90255300  |
| C | -6.50795500 | -0.49175500 | 0.50263800  |
| N | -5.76186500 | -2.77807300 | 0.12651300  |
| H | -2.56155500 | -1.59579000 | -1.73221700 |
| C | -3.64902600 | -3.29243200 | -0.95186100 |
| C | -8.42711700 | 1.34114900  | 1.33825900  |
| H | -7.00647600 | 2.90459900  | 0.89070900  |
| N | -7.70519800 | -0.96060500 | 0.93968700  |
| C | -4.86196200 | -3.67340900 | -0.33401400 |
| H | -3.00510600 | -4.04490900 | -1.39592600 |
| C | -8.63518300 | -0.06895500 | 1.33798300  |
| H | -9.21929800 | 2.00088400  | 1.67524900  |
| H | -5.13685000 | -4.71961000 | -0.23918300 |
| H | -9.58212700 | -0.48614400 | 1.66933000  |
| C | 4.38052600  | 0.17970800  | -0.15534500 |
| C | 4.60493300  | -1.04723900 | -0.75185600 |
| C | 5.37329800  | 0.80021400  | 0.70535000  |
| C | 5.85776500  | -1.72086200 | -0.61487300 |
| H | 3.83665100  | -1.49676000 | -1.37971000 |
| C | 6.65127100  | 0.15272900  | 0.83743700  |
| C | 5.15454400  | 1.97346800  | 1.48754900  |
| C | 6.11752500  | -2.97999600 | -1.23527400 |
| C | 6.90659400  | -1.11620500 | 0.15671600  |
| N | 7.64928400  | 0.67313200  | 1.61258200  |
| H | 4.18801500  | 2.46773900  | 1.50109900  |
| C | 6.17714900  | 2.47472200  | 2.28733000  |

|    |             |             |             |
|----|-------------|-------------|-------------|
| C  | 7.36515400  | -3.57055400 | -1.07408900 |
| H  | 5.34658600  | -3.46187800 | -1.83134900 |
| N  | 8.12942900  | -1.70579400 | 0.29451400  |
| C  | 7.42747900  | 1.79767700  | 2.30334000  |
| H  | 6.03293200  | 3.35882800  | 2.89957600  |
| C  | 8.35155100  | -2.88468800 | -0.30555000 |
| H  | 7.60711300  | -4.52478600 | -1.52983100 |
| H  | 8.25468500  | 2.17009800  | 2.90124800  |
| H  | 9.34698300  | -3.30427100 | -0.18618900 |
| Hg | -1.12442100 | -0.81219300 | 0.30776000  |
| N  | 3.11618000  | 0.80487100  | -0.43126200 |
| H  | 2.27174300  | 0.21309500  | -0.49818000 |
